# Supplementary material for: The landscape of kinase fusions in cancer
Source: PubMed Central journal article supplement (PMC4175590; doi:10.1038/ncomms5846), 2014-09-10
Supplement: ncomms5846-s1.pdf [file ncomms5846-s1.pdf]

## Supplementary Figures

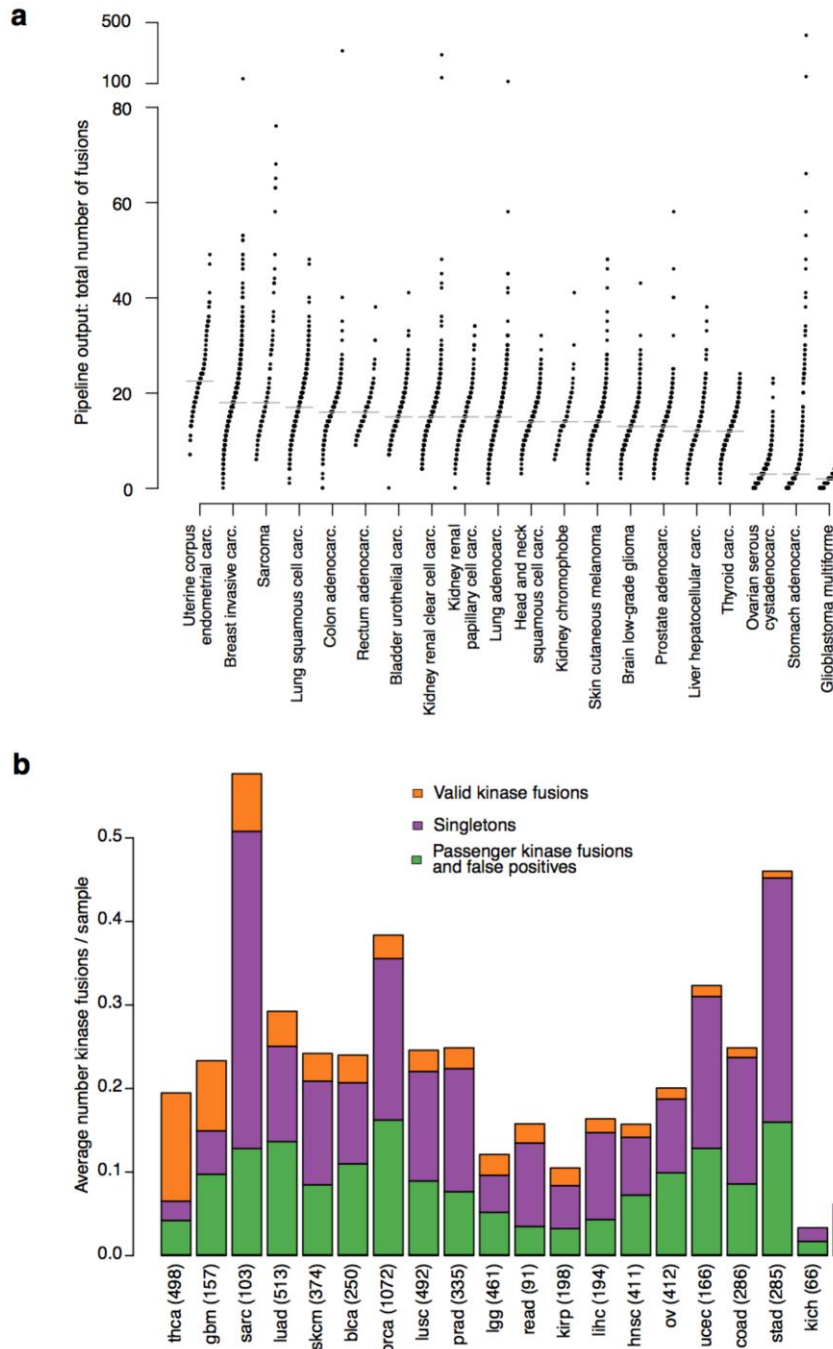

### Supplementary Figure 1: Output of pipeline

**a**, Each dot corresponds to a tumor, with vertical position indicating the total number of fusions identified. Tumor types are ordered by their median number of fusions per sample, indicated by a grey horizontal line. **b**, For each tumor type, the average number of kinase fusions per sample is indicated and color-coded by category.

participant ID: 5c631aef-0d24-4497-83b9-3f71675e90e8  
 2cdaa358-cba5-4c7c-bd9a-6a459f0c7ee  
 03570ba4-236b-4ec2-8212-d7341eb09c19  
 d025f4ee-468c-417f-94e2-4a8212f712c0  
 c5ebb089-2c71-44bf-8af0-75f14195aae1  
 cancer type: lung adenocarcinoma

...GTCATCATCAACCAAGTGTACCGCCGGAAGCA...  
 . V I I N Q Y Y R R K .

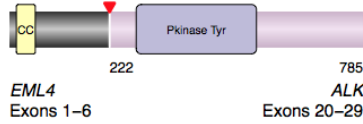

participant ID: 100f3512-7a98-412e-8a20-12f547fa3d65  
 cancer type: thyroid carcinoma

...GTCATCATCAACCAAGGCGGCAATGCAGCCTC...  
 . V I I N Q G G N A A .

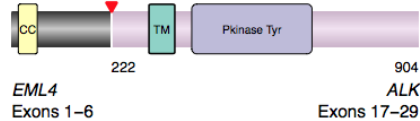

participant ID: 78b55924-02ae-49d2-98f5-48c7a6e3542  
 cancer type: bladder cancer

...ATTGATGACTTAGAAGTGTACCGCCGGAAGCA...  
 . I D D L E Y Y R R K .

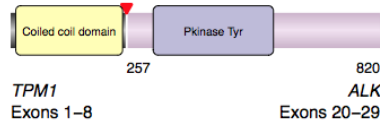

participant ID: 0d29200e-946b-4ec1-990f-ddb7443b5c9e (thyroid carcinoma)  
 34d1f767-ce01-44b6-9b7e-f5014ed52a0e (kidney papillary)

...CCAAGCTATGATTCTGTGTACCGCCGGAAGCA...  
 . P S Y D S Y Y R R K .

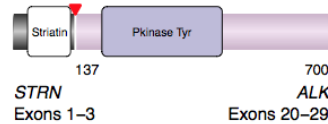

participant ID: a304de25-4fd0-475e-8fd9-65f0b0f77068  
 cancer type: rectum adenocarcinoma

...AACACAATTGTCCCGTTCATAGCTCCTTGG...  
 . N T I C P G H S S L .

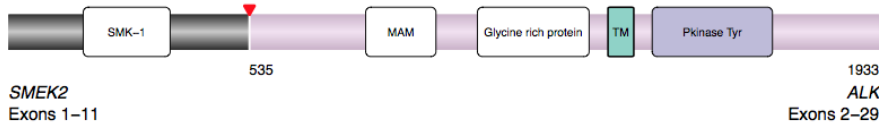

participant ID: 4f3d2561-fc5d-4fcf-8688-96eade990f83  
 cancer type: thyroid carcinoma

...GTCCATGACAAGTCAGTGTACCGCCGGAAGCA...  
 . V H D K S Y Y R R K .

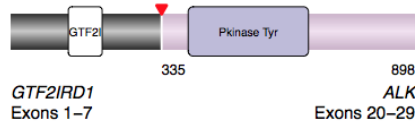

Pkinase Tyr: Protein tyrosine kinase  
 SMK-1: Component of IIS longevity pathway SMK-1  
 MAM: MAM domain  
 GTF2I: GTF2I-like repeat  
 CC: Coiled-coil domain  
 TM: Transmembrane domain

## Supplementary Figure 2: ALK fusions

Protein domains, sample details, cancer type, gene partners, as well as genomic and amino acid sequence are indicated for each predicted kinase fusion proteins. In addition, the protein coordinates of the fusion breakpoints and the total amino acid length of the fusion protein are noted under each protein structure. The protein tyrosine kinase domains are colored in purple, the transmembrane domains (TM) are indicated in teal, coiled-coil (CC) dimerization domains are indicated in yellow, whereas other domains are left in white. Fusion breakpoints are delineated by red arrows.

participant ID: 3ac69d4b-68f7-4d85-88e9-191a3d195047  
cancer type: glioblastoma

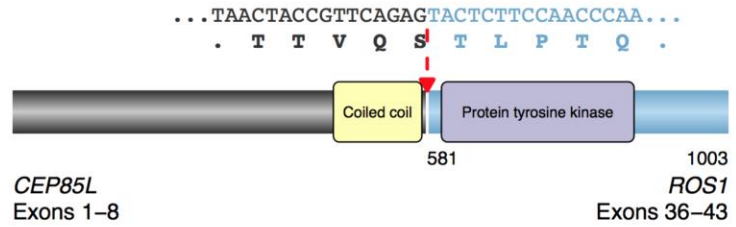

### Supplementary Figure 3: *ROS1* fusions

Protein domains, sample details, cancer type, gene partners, as well as genomic and amino acid sequence are indicated for each predicted kinase fusion proteins. In addition, the protein coordinates of the fusion breakpoints and the total amino acid length of the fusion protein are noted under each protein structure. The protein tyrosine kinase domain is colored in purple, the coiled-coil (CC) dimerization domain is indicated in yellow. Fusion breakpoint is delineated by a red arrow.

participant ID: 47ad3d2e-9096-4e6d-864f-83507fd8e970  
cancer type: thyroid carcinoma

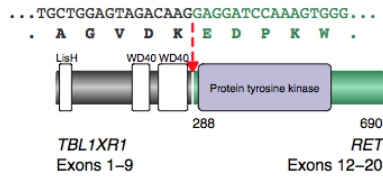

participant ID: 3d114411-0215-4870-87d6-7f08ca8f771  
cancer type: thyroid carcinoma

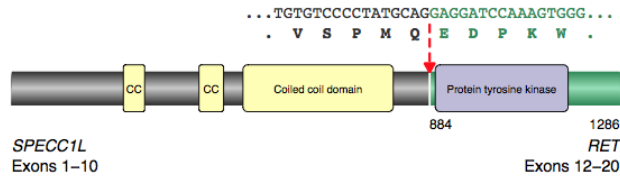

participant ID: 494fec2d-a439-4b21-903c-6ef07b08fe4  
cancer type: thyroid carcinoma

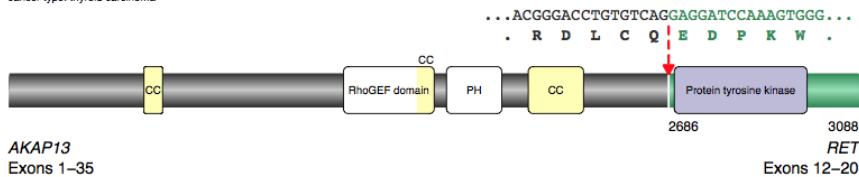

participant ID: cb87eb0f-2502-4277-a8ef-435b08f3c863  
cancer type: colon adenocarcinoma

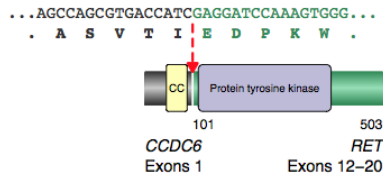

participant ID: 449ee008-36eb-4cb8-8717-be79a568481f  
cancer type: thyroid carcinoma

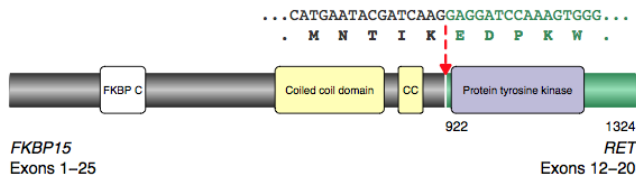

participant ID: 8a209c68-bef9-4191-b6ec-7a1a9258b3bd  
cancer type: breast invasive carcinoma

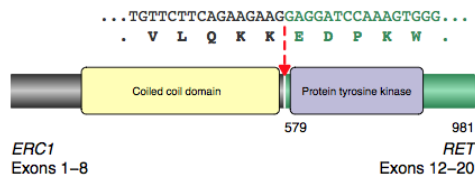

CC: Coiled coil domain  
 LisH: LisH  
 WD40: WD domain, G-beta repeat  
 FKBP C: FKBP-type peptidyl-prolyl cis-trans isomerase  
 PH: PH domain

### Supplementary Figure 4: *RET* fusions

Protein domains, sample details, cancer type, gene partners, as well as genomic and amino acid sequence are indicated for each predicted kinase fusion proteins. In addition, the protein coordinates of the fusion breakpoints and the total amino acid length of the fusion protein are noted under each protein structure. The protein tyrosine kinase domains are colored in purple, the transmembrane domains (TM) are indicated in teal, coiled-coil (CC) dimerization domains are indicated in yellow, whereas other domains are left in white. Fusion breakpoints are delineated by red arrows.

participant ID: 922e54e-7c0b-4261-97b2-344da6abc267  
 cancer type: prostate adenocarcinoma

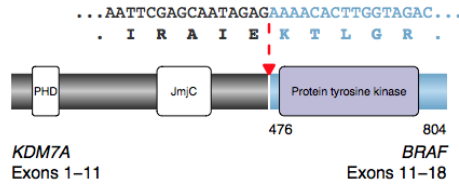

participant ID: 60e574aa-167a-442d-8642-e8426d5bb24b  
 cancer type: skin cutaneous melanoma

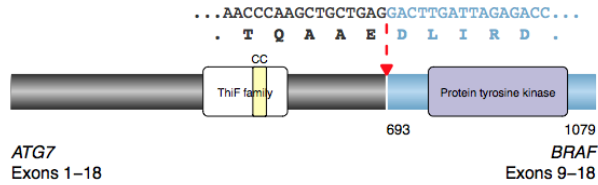

participant ID: 6f7b7201-31bd-4647-86fc-85dbb40f02e3  
 cancer type: thyroid carcinoma

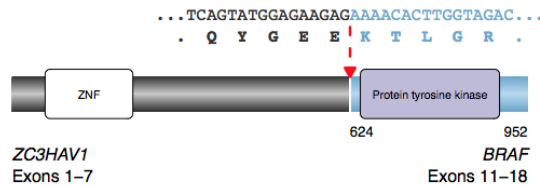

participant ID: ba92c434-3604-4b85-bc76-3bbe5c44253f  
 cancer type: thyroid carcinoma

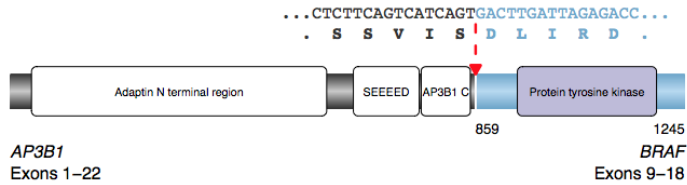

participant ID: 117a21dd-d717-4320-abe3-08c2d5041fc5  
 cancer type: thyroid carcinoma

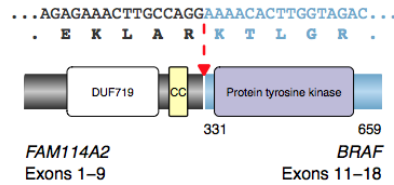

participant ID: 719b0041-becc-45a0-b5be-059426574e90  
 cancer type: thyroid carcinoma

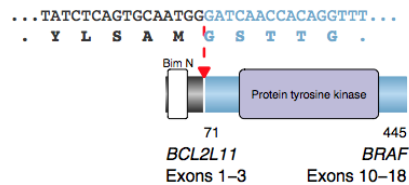

AP3B1\_C: Clathrin-adaptor complex-3 beta-1 subunit C-terminal  
 SEEEEED: Serine-rich region of AP3B1, clathrin-adaptor complex  
 DUF719: Protein of unknown function (DUF719)  
 PHD: PHD-finger  
 JmjC: JmjC domain, hydroxylase  
 CC: Coiled\_Coil  
 Bim N: Bim protein N-terminus

### Supplementary Figure 5: BRAF fusions

Protein domains, sample details, cancer type, gene partners, as well as genomic and amino acid sequence are indicated for each predicted kinase fusion proteins. In addition, the protein coordinates of the fusion breakpoints and the total amino acid length of the fusion protein are noted under each protein structure. The protein tyrosine kinase domains are colored in purple, the transmembrane domains (TM) are indicated in teal, coiled-coil (CC) dimerization domains are indicated in yellow, whereas other domains are left in white. Fusion breakpoints are delineated by red arrows.

participant ID: 5fa9190-c423-4193-800d-1b38c4e9a810 (thyroid carcinoma)  
 7981ceb4-3f67-4060-9deb-54288cb1c5cb (thyroid carcinoma)  
 9b585da2-52b5-4885-b063-d40992649bb9 (thyroid carcinoma)  
 6fa50314-44cf-4545-9160-452170ea47e9 (thyroid carcinoma)  
 fa0b5119-7406-49e1-a853-51ceade839ffa (thyroid carcinoma)  
 d2d8257d-2763-4538-93a7-192d4923c2ef (thyroid carcinoma)  
 2b16f848-9038-413f-8ae1-a27ac0e029a2 (thyroid carcinoma)  
 922e5a4e-7c0b-4261-97b2-344da6abc267 (prostate adenocarcinoma)

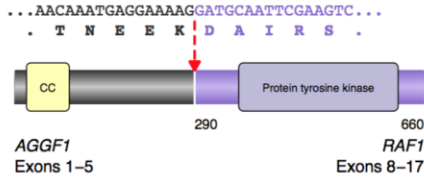

participant ID: 238589a3-17d7-49d5-bdc3-b561d5a1ef3b  
 cancer type: prostate adenocarcinoma

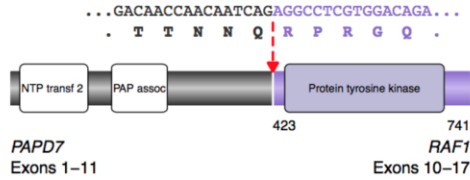

participant ID: b10a88d5-3469-4e19-956a-09d83e04149d  
 cancer type: skin cutaneous melanoma

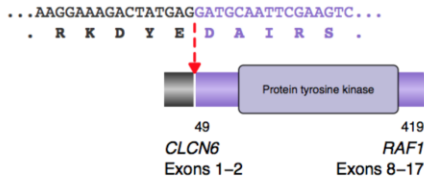

participant ID: 8cb1790f-9139-4617-8315-fefdf57de8d1  
 cancer type: skin cutaneous melanoma

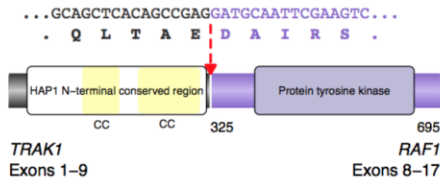

participant ID: 8e2cd8f4-b121-403b-bf83-66f8da646776  
 cancer type: skin cutaneous melanoma

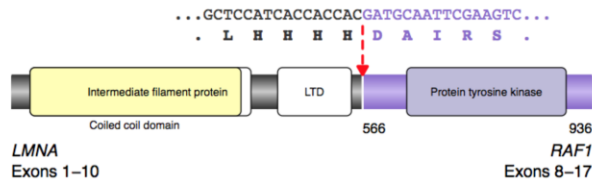

participant ID: b28c3eb9-7970-42a7-9641-9209213e9042  
 cancer type: skin cutaneous melanoma

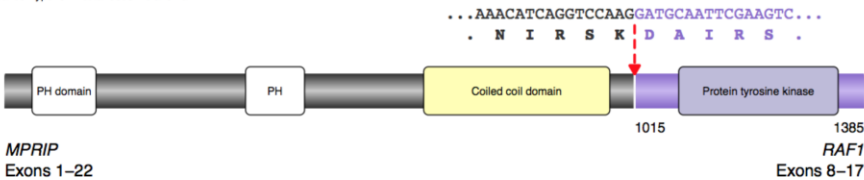

CC: Coiled coil domain      NTP transf 2: Nucleotidyltransferase domain  
 PAP assoc: Cid1 family poly A polymerase      LTD: Lamin Tail Domain

### Supplementary Figure 6: RAF1 fusions

Protein domains, sample details, cancer type, gene partners, as well as genomic and amino acid sequence are indicated for each predicted kinase fusion proteins. In addition, the protein coordinates of the fusion breakpoints and the total amino acid length of the fusion protein are noted under each protein structure. The protein tyrosine kinase domains are colored in purple, the transmembrane domains (TM) are indicated in teal, coiled-coil (CC) dimerization domains are indicated in yellow, whereas other domains are left in white. Fusion breakpoints are delineated by red arrows.

participant ID: 1b4388e8-0ff1-46f2-9396-2cc8f2f11ceb  
 cancer type: low grade glioma

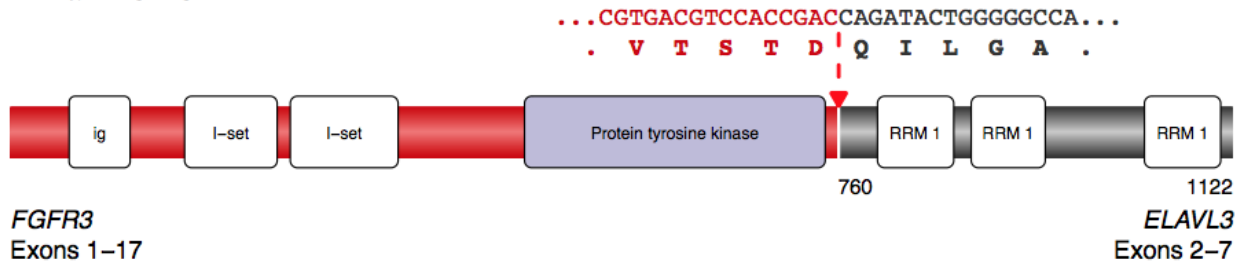

participant ID: 6d78186c-ca8d-4fe2-befc-a14949a84c38  
 cancer type: prostate adenocarcinoma

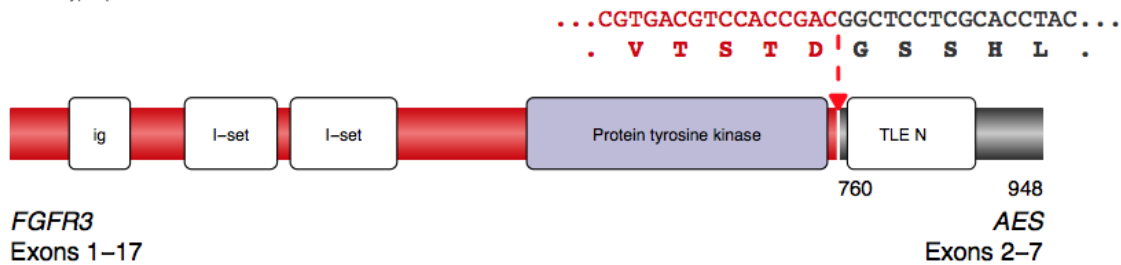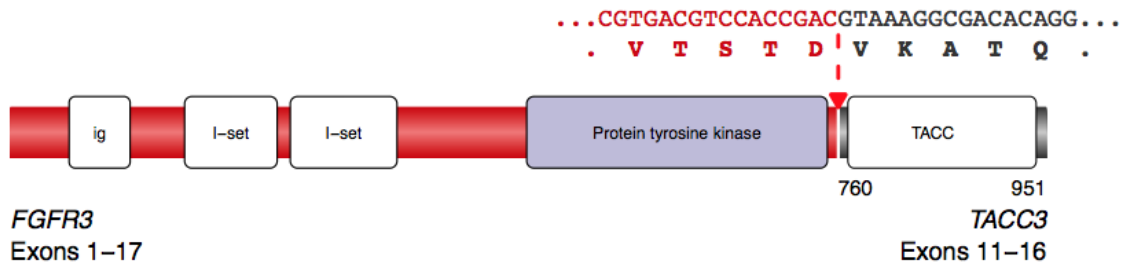

|                                                                |                                                                 |
|----------------------------------------------------------------|-----------------------------------------------------------------|
| I-set: Immunoglobulin I-set domain                             | TLE N: Groucho/TLE N-terminal Q-rich domain                     |
| ig: Immunoglobulin domain                                      | TACC: Transforming acidic coiled-coil-containing protein (TACC) |
| RRM 1: RNA recognition motif. (a.k.a. RRM, RBD, or RNP domain) |                                                                 |

### Supplementary Figure 7: *FGFR3* fusions

Protein domains, sample details, cancer type, gene partners, as well as genomic and amino acid sequence are indicated for each predicted kinase fusion proteins. In addition, the protein coordinates of the fusion breakpoints and the total amino acid length of the fusion protein are noted under each protein structure. The protein tyrosine kinase domains are colored in purple, the transmembrane domains (TM) are indicated in teal, coiled-coil (CC) dimerization domains are indicated in yellow, whereas other domains are left in white. Fusion breakpoints are delineated by red arrows.

participant ID: f6f2d86e-fa34-43bd-a89b-09add6995833  
 cancer type: Lung adenocarcinoma

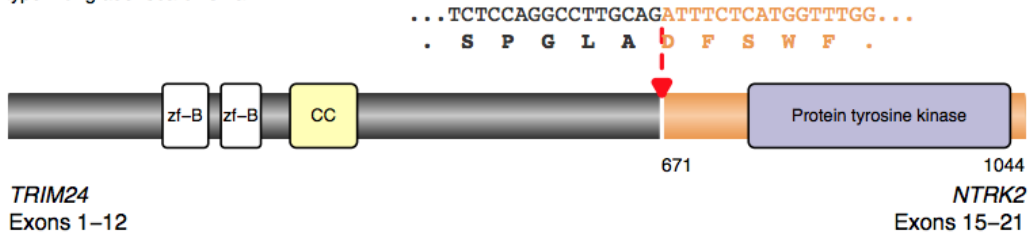

participant ID: b2e0a631-c703-4601-945b-6fadf2f30656  
 cancer type: Low grade glioma

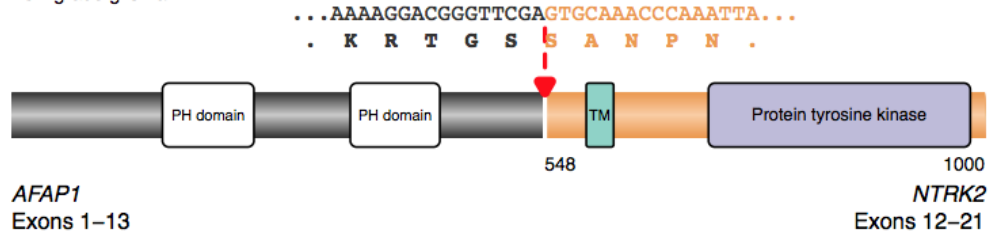

participant ID: 01c9c486-321f-4ebc-ade7-bbe6ea5c4a6e  
 cancer type: Head and neck squamous cell carcinoma

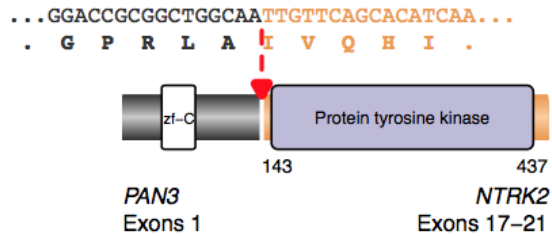

participant ID: e4e84c27-69c6-4972-ac64-aa78ff6d6f02  
 cancer type: Lower grade glioma

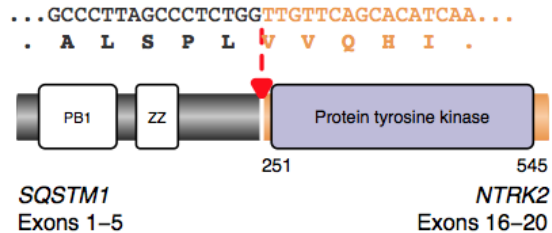

CC: Coiled\_Coil  
 PB1: PB1 domain  
 TM: Transmembrane domain  
 zf-B\_box: B-box zinc finger  
 zf-CCCH: Zinc finger C-x8-C-x5-C-x3-H type (and similar)  
 ZZ: Zinc finger, ZZ type

### Supplementary Figure 8: *NTRK2* fusions

Protein domains, sample details, cancer type, gene partners, as well as genomic and amino acid sequence are indicated for each predicted kinase fusion proteins. In addition, the protein coordinates of the fusion breakpoints and the total amino acid length of the fusion protein are noted under each protein structure. The protein tyrosine kinase domains are colored in purple, the transmembrane domains (TM) are indicated in teal, coiled-coil (CC) dimerization domains are indicated in yellow, whereas other domains are left in white. Fusion breakpoints are delineated by red arrows.



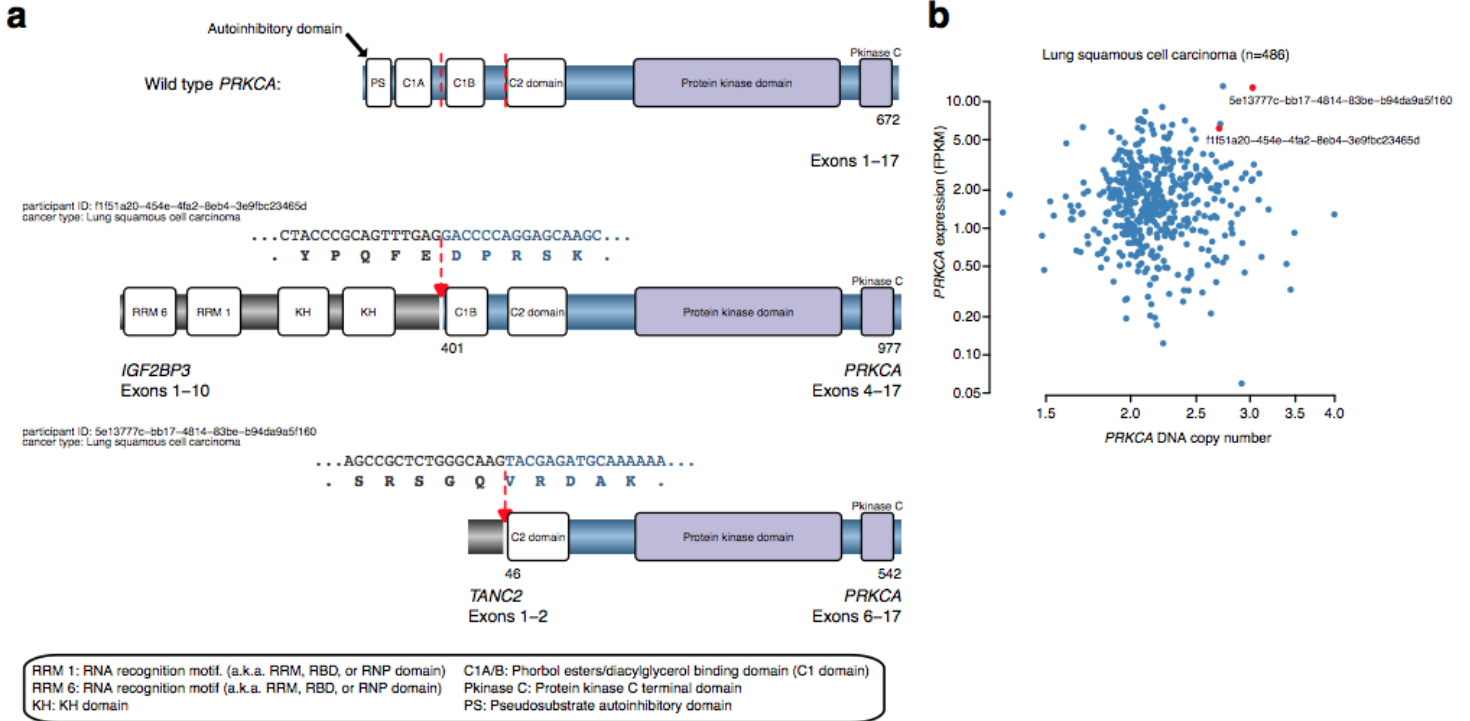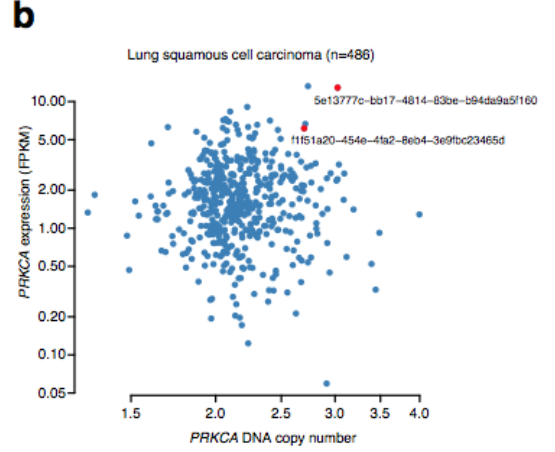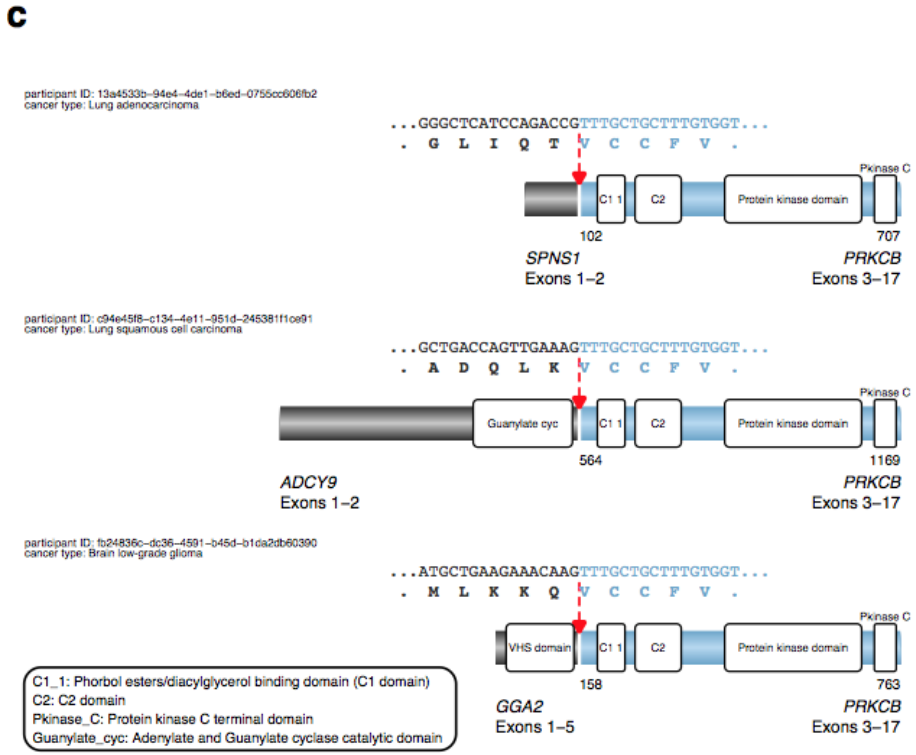

**Supplementary Figure 9: PRKCA/PRKCB fusions**

**a**, Structure of PRKCA wild-type (top) and of the two PRKCA fusion proteins. **b**, Scatter plot of the PRKCA copy number versus mRNA expression. Each dot represents a sample with the red dots representing the samples harboring PRKCA fusions. **c**, Structure of the three PRKCB fusion proteins.

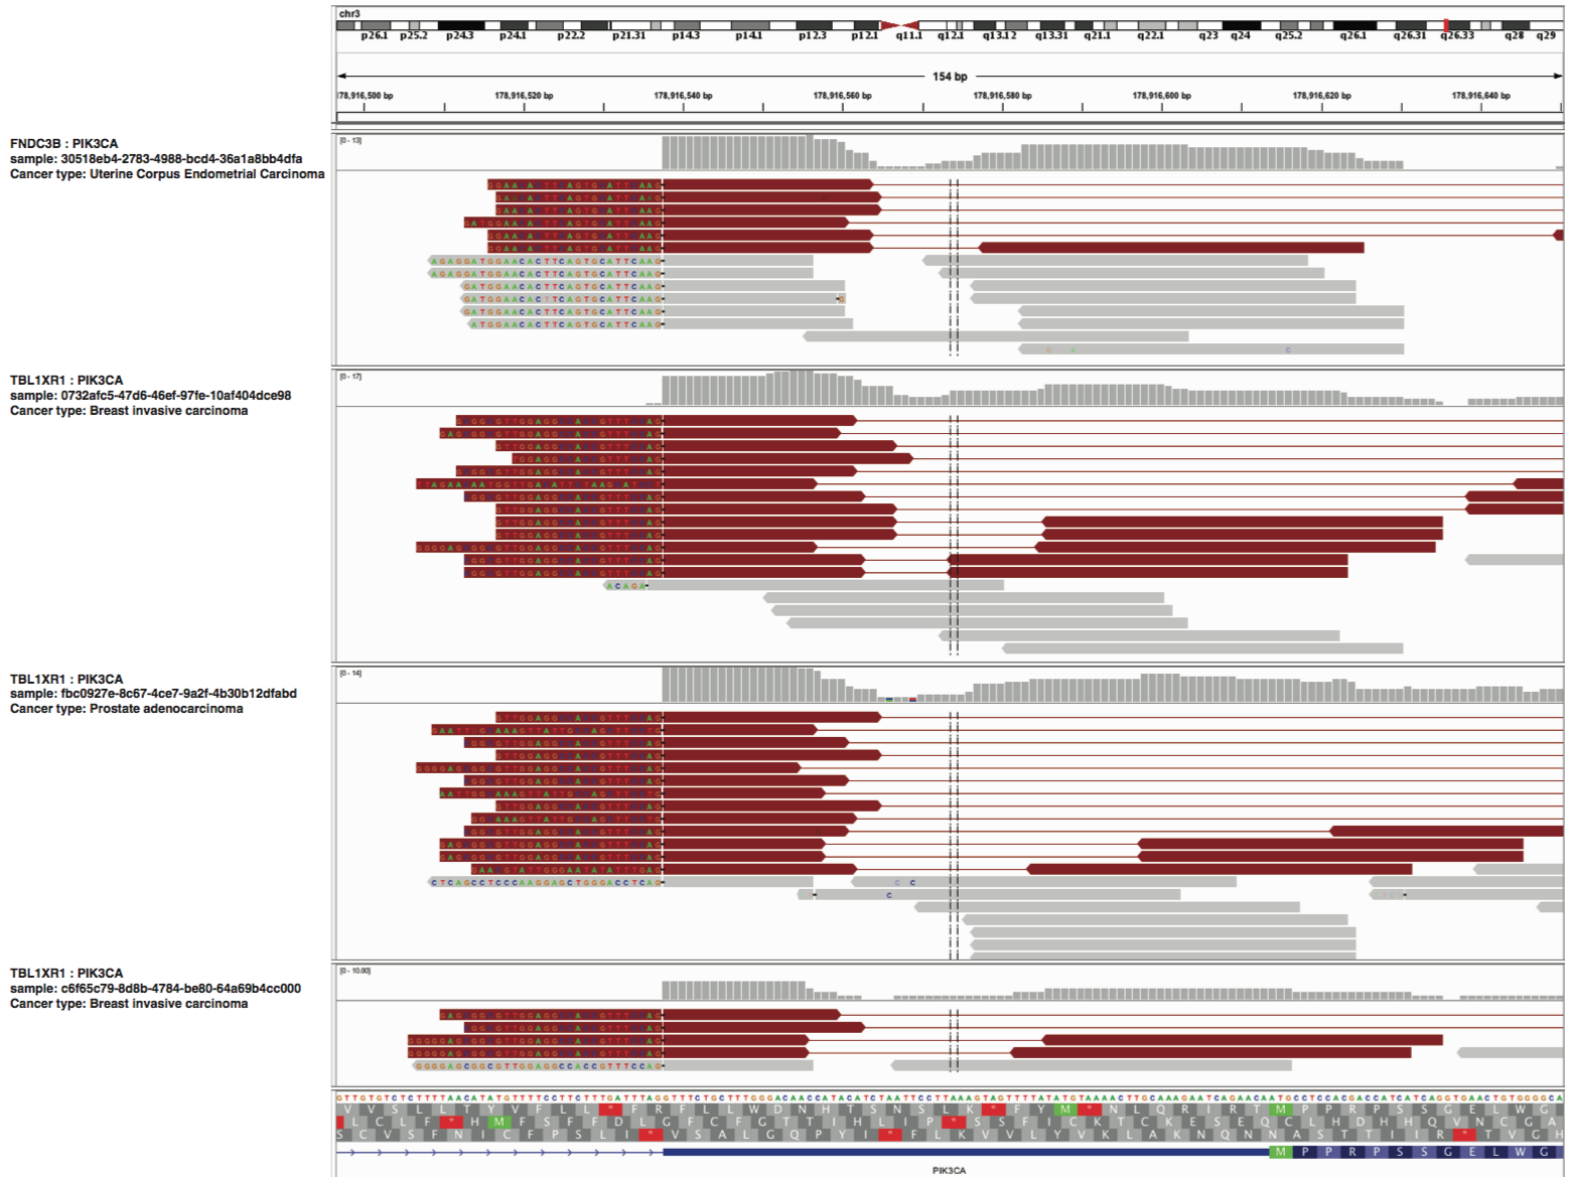

### Supplementary Figure 10: *PIK3CA* fusions sequencing reads (1/2)

Sequencing reads mapping to *PIK3CA* (screenshots from the integrative genome viewer) supporting the presence of *PIK3CA* fusions in four TCGA samples. All reads are either chimeric (one end maps to *PIK3CA* and the other end maps to the partner gene) or split between both genes, with soft-clipped bases shown.

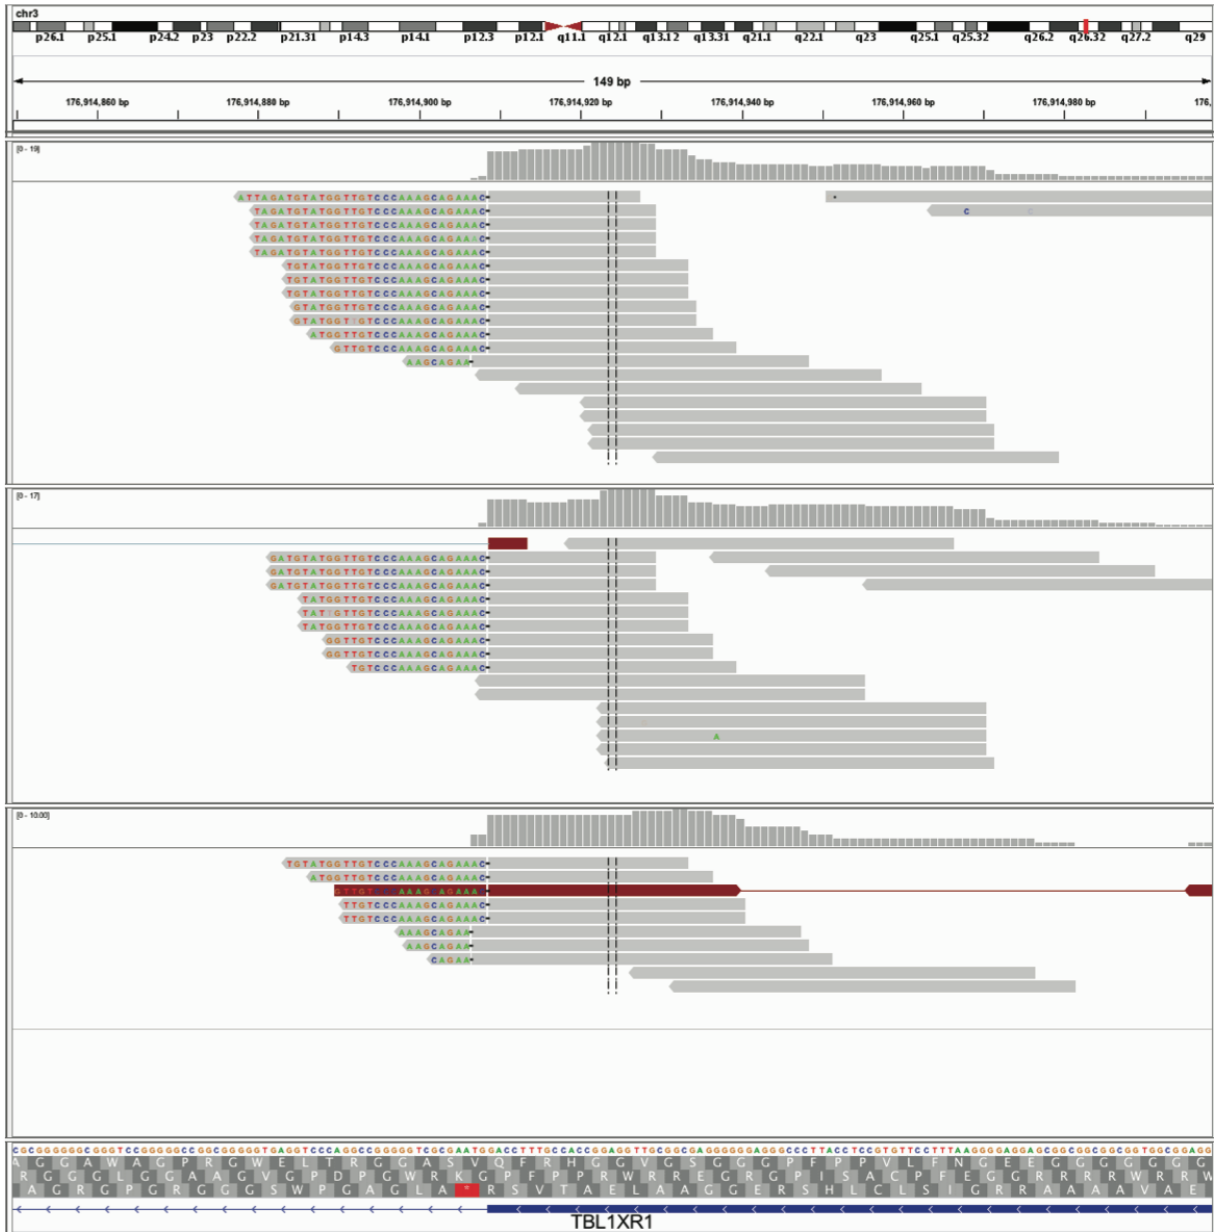

**Supplementary Figure 11: *TBL1XR1-PIK3CA* fusions sequencing reads (2/2)**

Sequencing reads mapping to *TBL1XR1* (screenshots from the integrative genome viewer) supporting the presence of *TBL1XR1-PIK3CA* fusions in three TCGA samples. All reads are either chimeric (one end maps to *PIK3CA* and the other end maps to the partner gene) or split between both genes, with soft-clipped bases shown.

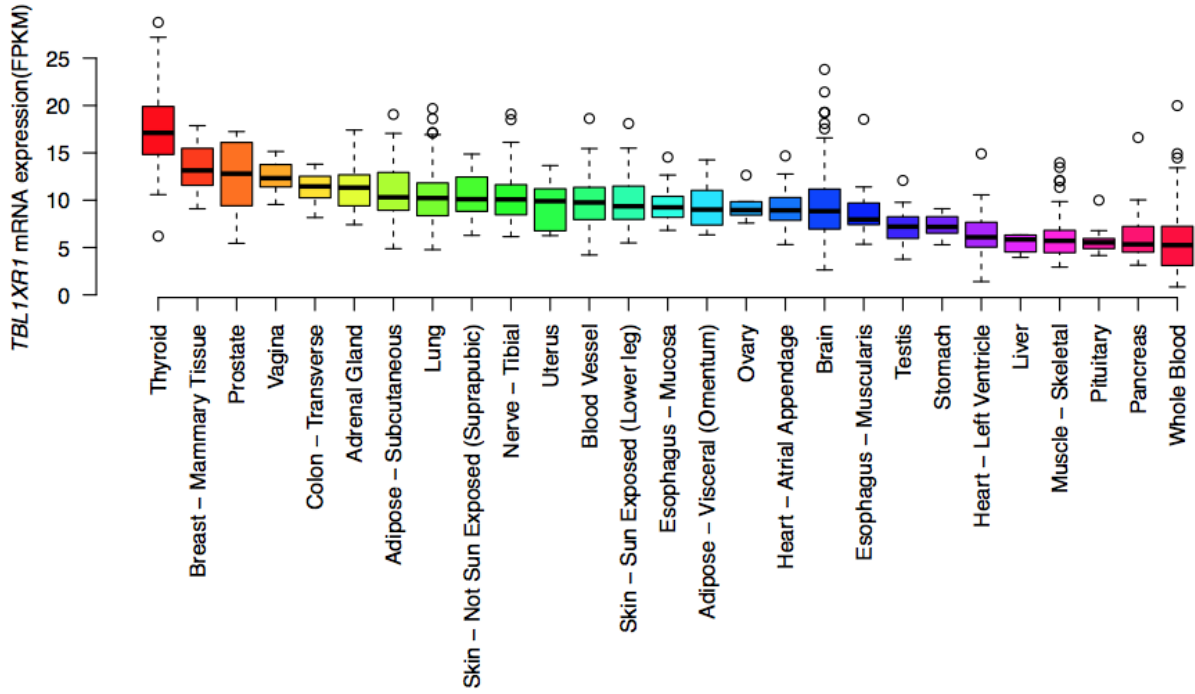

**Supplementary Figure 12: *PIK3CA* expression in normal samples.**

*PIK3CA* expression across 1,750 normal samples from the GTEx project, in 27 tissue types, ordered by their median expression (bold horizontal line). Boxplot whiskers extend to the most extreme data point which is no more than 1.5 times the interquartile range from the box (first and third quartiles). Outlier values are indicated with circles.

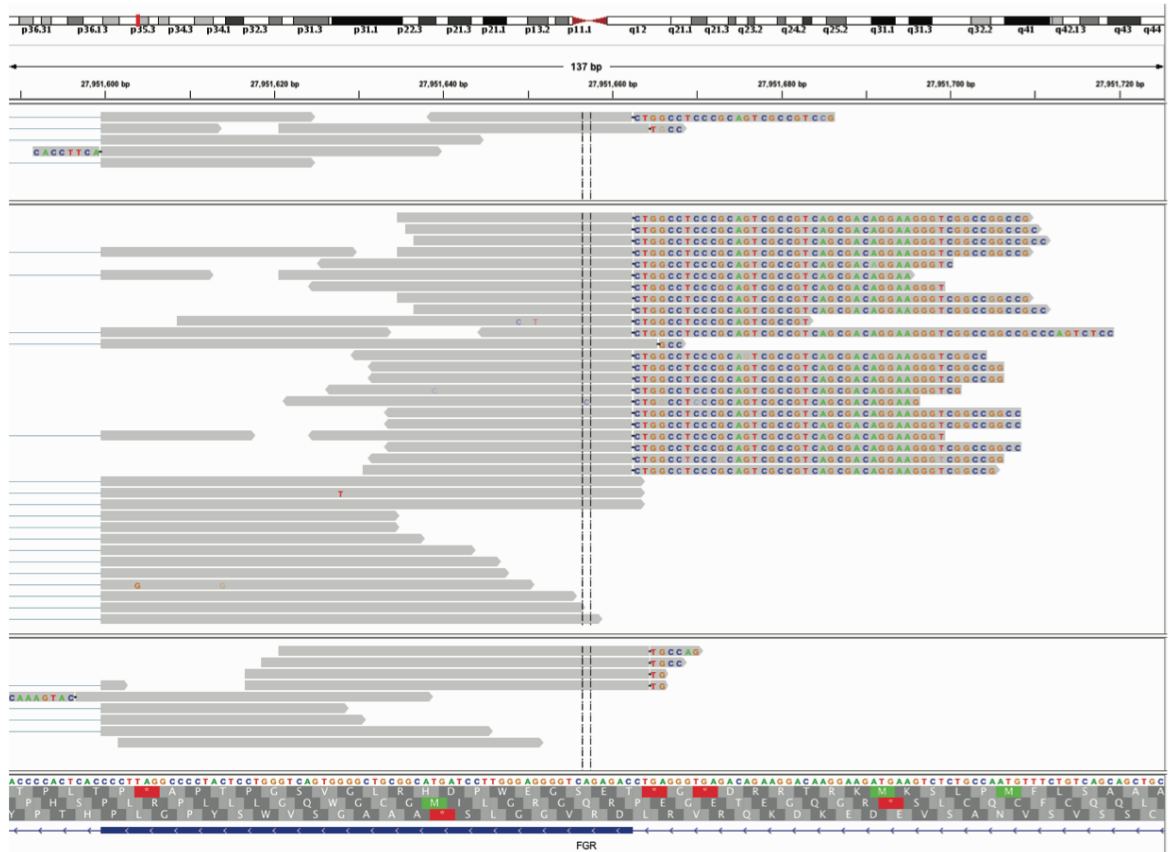

### Supplementary Figure 13: *FGR* fusions (1/2)

Sequencing reads mapping to *FGR* (screenshots from the integrative genome viewer) supporting the presence of *WASF2-FGR* fusions in three TCGA samples. All reads are either chimeric (one end maps to *FGR* and the other end maps to *WASF2*) or split between both genes, with soft-clipped bases shown.

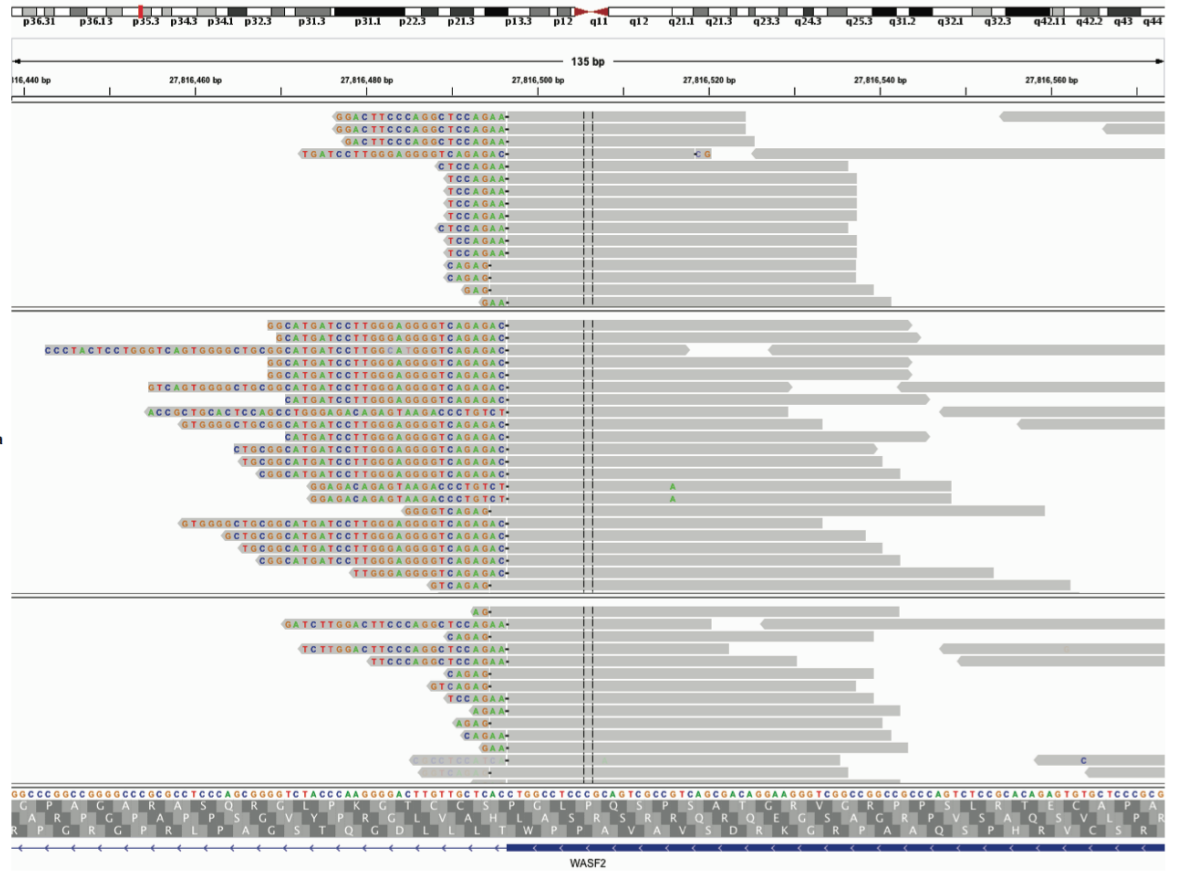

### Supplementary Figure 14: *FGR* fusions (2/2)

Sequencing reads mapping to *WASF2* (screenshots from the integrative genome viewer) supporting the presence of *WASF2-FGR* fusions in three TCGA samples. All reads are either chimeric (one end maps to *FGR* and the other end maps to *WASF2*) or split between both genes, with soft-clipped bases shown.

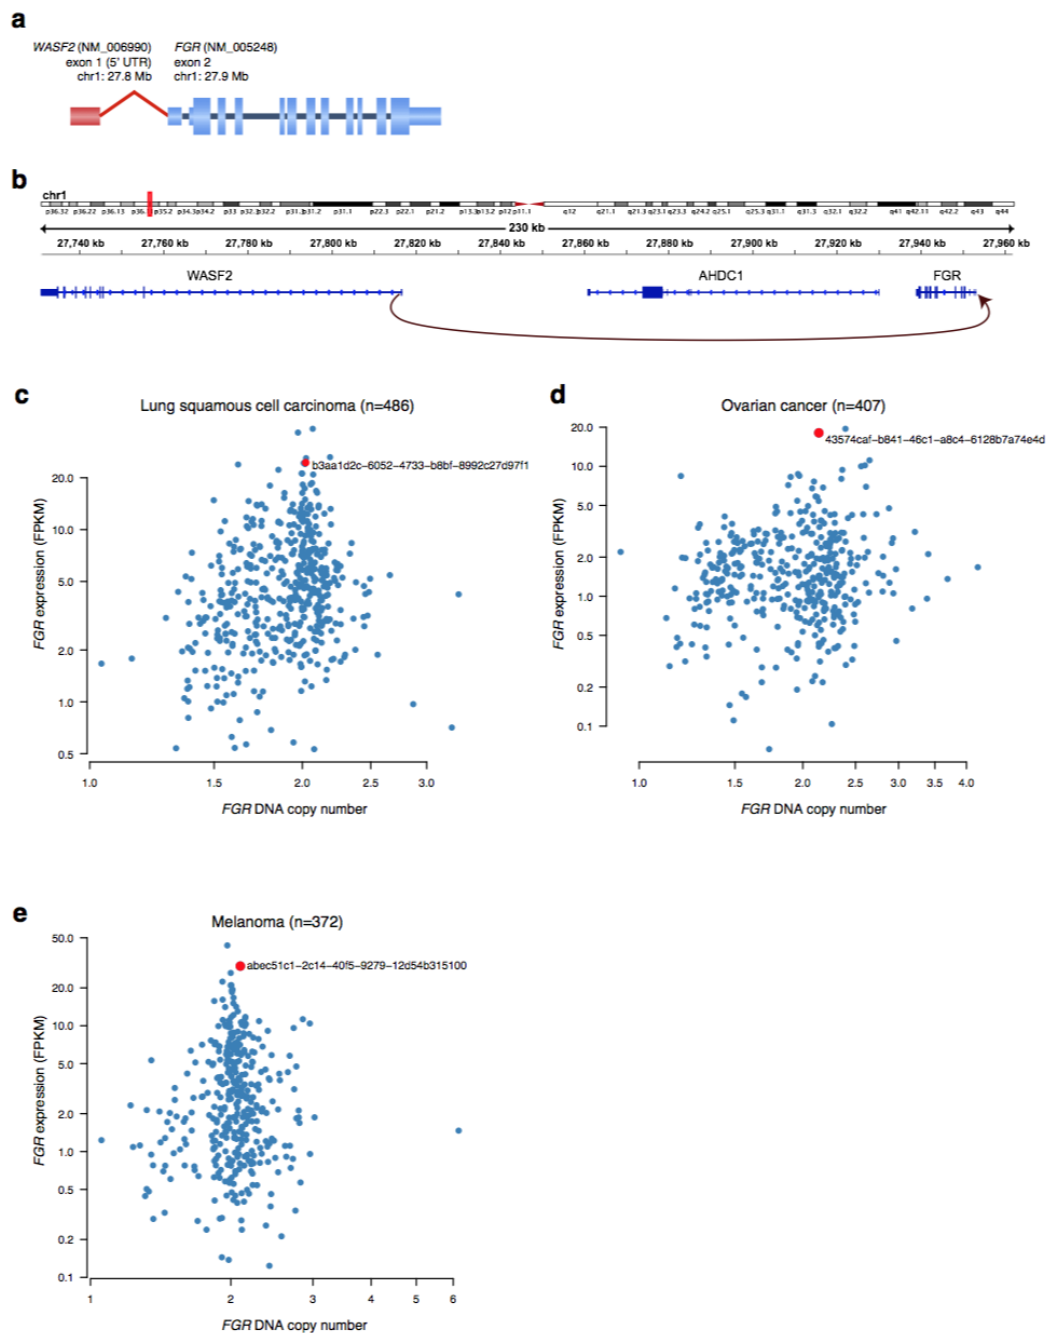

### Supplementary Figure 15: *FGR* fusions

**a, b**, Genomic structure of *WASF2-FGR* fusions. In all cases the entire coding sequence of *FGR* is present in the predicted fusion sequence. RefSeq IDs, exon numbers, and genomic coordinates are indicated. Exon 1 of *WASF2* (5-prime UTR) is fused to exon 2 of *FGR* (5-prime UTR). **c-e**, Scatter plots of *FGR* DNA copy number versus mRNA expression across all TCGA samples for which both data types are available. Samples harboring a *FGR* fusion are depicted in red (along with TCGA sample ID) and show a high expression of *FGR* relative to the other samples. FPKM: Fragments per kilobase of transcript per million mapped reads.

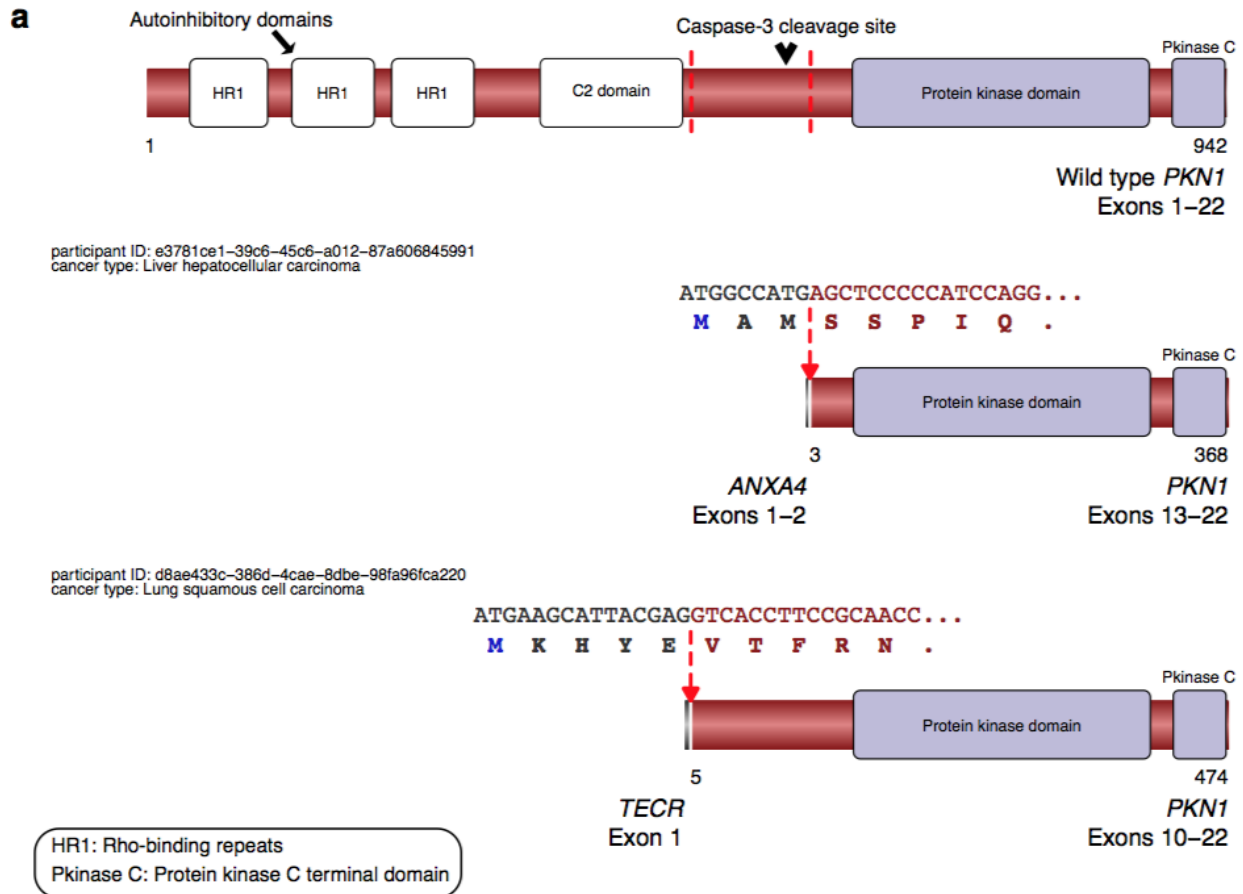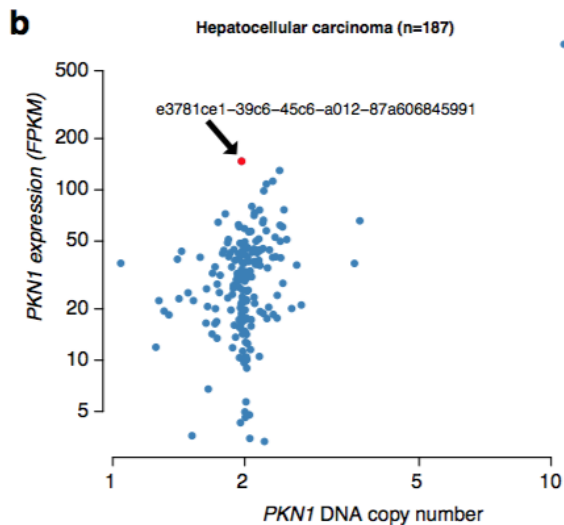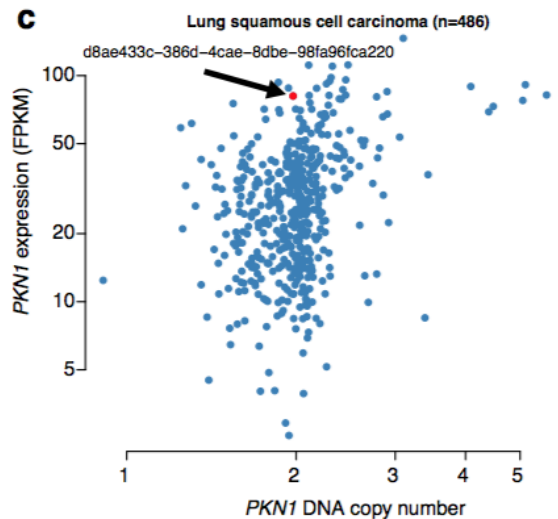

### Supplementary Figure 16: *PKN1* fusions

**a**, Protein structure of *PKN1* wild-type (top) and *PKN1* fusions. **b**, **c**, Scatter plots of *PKN1* DNA copy number versus mRNA expression across all TCGA samples for which both data types are available. Samples harboring a *PKN1* fusion are depicted in red, along with TCGA sample ID.



**Supplementary table 1: TCGA cancer types summary**

| <b>Study</b>        |                                       |                  |
|---------------------|---------------------------------------|------------------|
| <b>Abbreviation</b> | <b>Study Name</b>                     | <b>n samples</b> |
| blca                | Bladder Urothelial Carcinoma          | 250              |
| lgg                 | Brain Lower Grade Glioma              | 461              |
| brca                | Breast invasive carcinoma             | 1072             |
| coad                | Colon adenocarcinoma                  | 286              |
| gbm                 | Glioblastoma multiforme               | 157              |
| hnsc                | Head and Neck squamous cell carcinoma | 411              |
| kich                | Kidney Chromophobe                    | 66               |
| kirc                | Kidney renal clear cell carcinoma     | 529              |
| kirp                | Kidney renal papillary cell carcinoma | 198              |
| lihc                | Liver hepatocellular carcinoma        | 194              |
| luad                | Lung adenocarcinoma                   | 513              |
| lusc                | Lung squamous cell carcinoma          | 492              |
| ov                  | Ovarian serous cystadenocarcinoma     | 412              |
| prad                | Prostate adenocarcinoma               | 335              |
| read                | Rectum adenocarcinoma                 | 91               |
| sarc                | Sarcoma                               | 103              |
| skcm                | Skin Cutaneous Melanoma               | 374              |
| stad                | Stomach adenocarcinoma                | 285              |
| thca                | Thyroid carcinoma                     | 498              |
| ucec                | Uterine Corpus Endometrial Carcinoma  | 166              |
